# Supplementary material
Source: Springer Nature journal article supplement (https://www.springermedizin.de/resource/supplementary/12889_2013_6023_MOESM1_ESM.pdf/9494152)
Supplement: MOESM1 [file 9494152]

## Context

- Obtaining organizational commitment
- Steering and working group
- Integration of the programme to organizational health system
- Local implementation planning groups
- Employee ambassadors
- Supervisor knowledge exchange
- Education of local therapists

Multi-faceted intervention

- ↑ supervisor knowledge

↑ knowledge:  
- about low back pain  
- how to manage low back pain  
- how to improve physical work environment

- ↑ supervisor and manager support

↓ perceived physical exertion  
↑ capacity to cope with pain  
↑ physical capacity

↓ low back pain  
↓ consequences

Resources

Input – programme

Immediate impacts

Behavioral impacts

Health outcomes
